# Supplementary material for: Forest Loss Related to Brazil Nut Production in Non-Timber Forest Product Concessions in a Micro-Watershed in the Peruvian Amazon
Source: MDPI journal article supplement (doi:10.3390/rs15235438), 2023-11-21
Supplement: s1 [file s1]

## Supplementary material

Forest loss related to Brazil nut production in non-timber forest product concessions in a micro-watershed in the Peruvian Amazon

Table S1. Landsat image database information.

| Sensor         | Path Row | Image Date      |
|----------------|----------|-----------------|
| Landsat 5 TM   | 002 68   | July 22, 2004   |
| Landsat 5 TM   | 002 69   | July 22, 2004   |
| Landsat 5 TM   | 003 68   | August 14, 2004 |
| Landsat 5 TM   | 002 68   | June 7, 2005    |
| Landsat 5 TM   | 002 69   | June 7, 2005    |
| Landsat 5 TM   | 003 68   | May 6, 2005     |
| Landsat 5 TM   | 002 68   | August 13, 2006 |
| Landsat 5 TM   | 002 69   | August 13, 2006 |
| Landsat 5 TM   | 003 68   | August 4, 2006  |
| Landsat 5 TM   | 002 68   | July 31, 2007   |
| Landsat 5 TM   | 002 69   | July 31, 2007   |
| Landsat 5 TM   | 003 68   | August 23, 2007 |
| Landsat 5 TM   | 002 68   | August 18, 2008 |
| Landsat 5 TM   | 002 69   | July 17, 2008   |
| Landsat 5 TM   | 003 68   | August 25, 2008 |
| Landsat 5 TM   | 002 68   | August 5, 2009  |
| Landsat 5 TM   | 002 69   | May 1, 2009     |
| Landsat 5 TM   | 003 68   | August 12, 2009 |
| Landsat 5 TM   | 002 68   | August 24, 2010 |
| Landsat 5 TM   | 002 69   | August 24, 2010 |
| Landsat 5 TM   | 003 68   | August 15, 2010 |
| Landsat 5 TM   | 002 68   | August 27, 2011 |
| Landsat 5 TM   | 002 69   | August 27, 2011 |
| Landsat 5 TM   | 003 68   | August 18, 2011 |
| Landsat 7 ETM+ | 002 68   | August 21, 2012 |
| Landsat 7 ETM+ | 002 69   | August 5, 2012  |
| Landsat 7 ETM+ | 003 68   | August 12, 2012 |
| Landsat 8 OLI  | 002 68   | August 16, 2013 |
| Landsat 8 OLI  | 002 69   | August 16, 2013 |
| Landsat 8 OLI  | 003 68   | July 22, 2013   |
| Landsat 8 OLI  | 002 68   | August 19, 2014 |
| Landsat 8 OLI  | 002 69   | August 19, 2014 |
| Landsat 8 OLI  | 003 68   | August 10, 2014 |
| Landsat 8 OLI  | 002 68   | August 22, 2015 |

|               |        |                 |
|---------------|--------|-----------------|
| Landsat 8 OLI | 002 69 | August 22, 2015 |
| Landsat 8 OLI | 003 68 | July 28, 2015   |
| Landsat 8 OLI | 002 68 | August 24, 2016 |
| Landsat 8 OLI | 002 69 | August 24, 2016 |
| Landsat 8 OLI | 003 68 | July 30, 2016   |
| Landsat 8 OLI | 002 68 | August 11, 2017 |
| Landsat 8 OLI | 002 69 | August 11, 2017 |
| Landsat 8 OLI | 003 68 | August 2, 2017  |
| Landsat 8 OLI | 002 68 | August 30, 2018 |
| Landsat 8 OLI | 002 69 | August 30, 2018 |
| Landsat 8 OLI | 003 68 | July 20, 2018   |
| Landsat 8 OLI | 002 68 | August 17, 2019 |
| Landsat 8 OLI | 002 69 | August 17, 2019 |
| Landsat 8 OLI | 003 68 | August 24, 2019 |
| Landsat 8 OLI | 002 68 | August 19, 2020 |
| Landsat 8 OLI | 002 69 | August 19, 2020 |
| Landsat 8 OLI | 003 68 | August 26, 2020 |

Source: Google Earth Engine (GEE) [29].

Table S2. Land cover legend adapted to study area.

| Level I                             | Level II                                                       |
|-------------------------------------|----------------------------------------------------------------|
| 1. Artificialized areas             | 1.1 Urbanized areas                                            |
|                                     | 1.2 Industrial areas and infrastructure                        |
|                                     | 1.3 Mining and infrastructure extraction areas and waste sites |
| 2. Agricultural areas               | 2.1 Transient crops                                            |
|                                     | 2.2 Permanent crops                                            |
|                                     | 2.3 Pastures                                                   |
|                                     | 2.4 Heterogeneous agricultural areas                           |
| 3. Forests and mostly natural areas | 3.1 Forest                                                     |
|                                     | 3.2 Planted Forests                                            |
|                                     | 3.3 Areas with herbaceous and/or shrubby vegetation            |
|                                     | 3.4 Areas with little or no vegetation                         |
| 4. Continental wetlands             | 4.1 Continental wetland areas                                  |
| 5. Water surface                    | 5.1 Inland waters                                              |

Source: MINAM [73]; taken and adapted from CORINE Land Cover [34].

Table S3. Land use in the study area.

| Years | Categories (ha)                 |                    |
|-------|---------------------------------|--------------------|
|       | Forest and mostly natural areas | Agricultural areas |
| 2004  | 348021.26                       | 6197.41            |
| 2005  | 347548.22                       | 6670.43            |
| 2006  | 347522.61                       | 6696.05            |
| 2007  | 347400.90                       | 6817.75            |
| 2008  | 347170.88                       | 7047.78            |
| 2009  | 347004.00                       | 7214.66            |
| 2010  | 346834.35                       | 7384.31            |
| 2011  | 346645.34                       | 7573.33            |
| 2012  | 346573.96                       | 7644.70            |
| 2013  | 346197.09                       | 8021.57            |
| 2014  | 345869.54                       | 8349.12            |
| 2015  | 345475.64                       | 8743.02            |
| 2016  | 345237.79                       | 8980.87            |
| 2017  | 345249.64                       | 8969.01            |
| 2018  | 345450.26                       | 8768.41            |
| 2019  | 345079.94                       | 9138.71            |
| 2020  | 344783.54                       | 9435.12            |

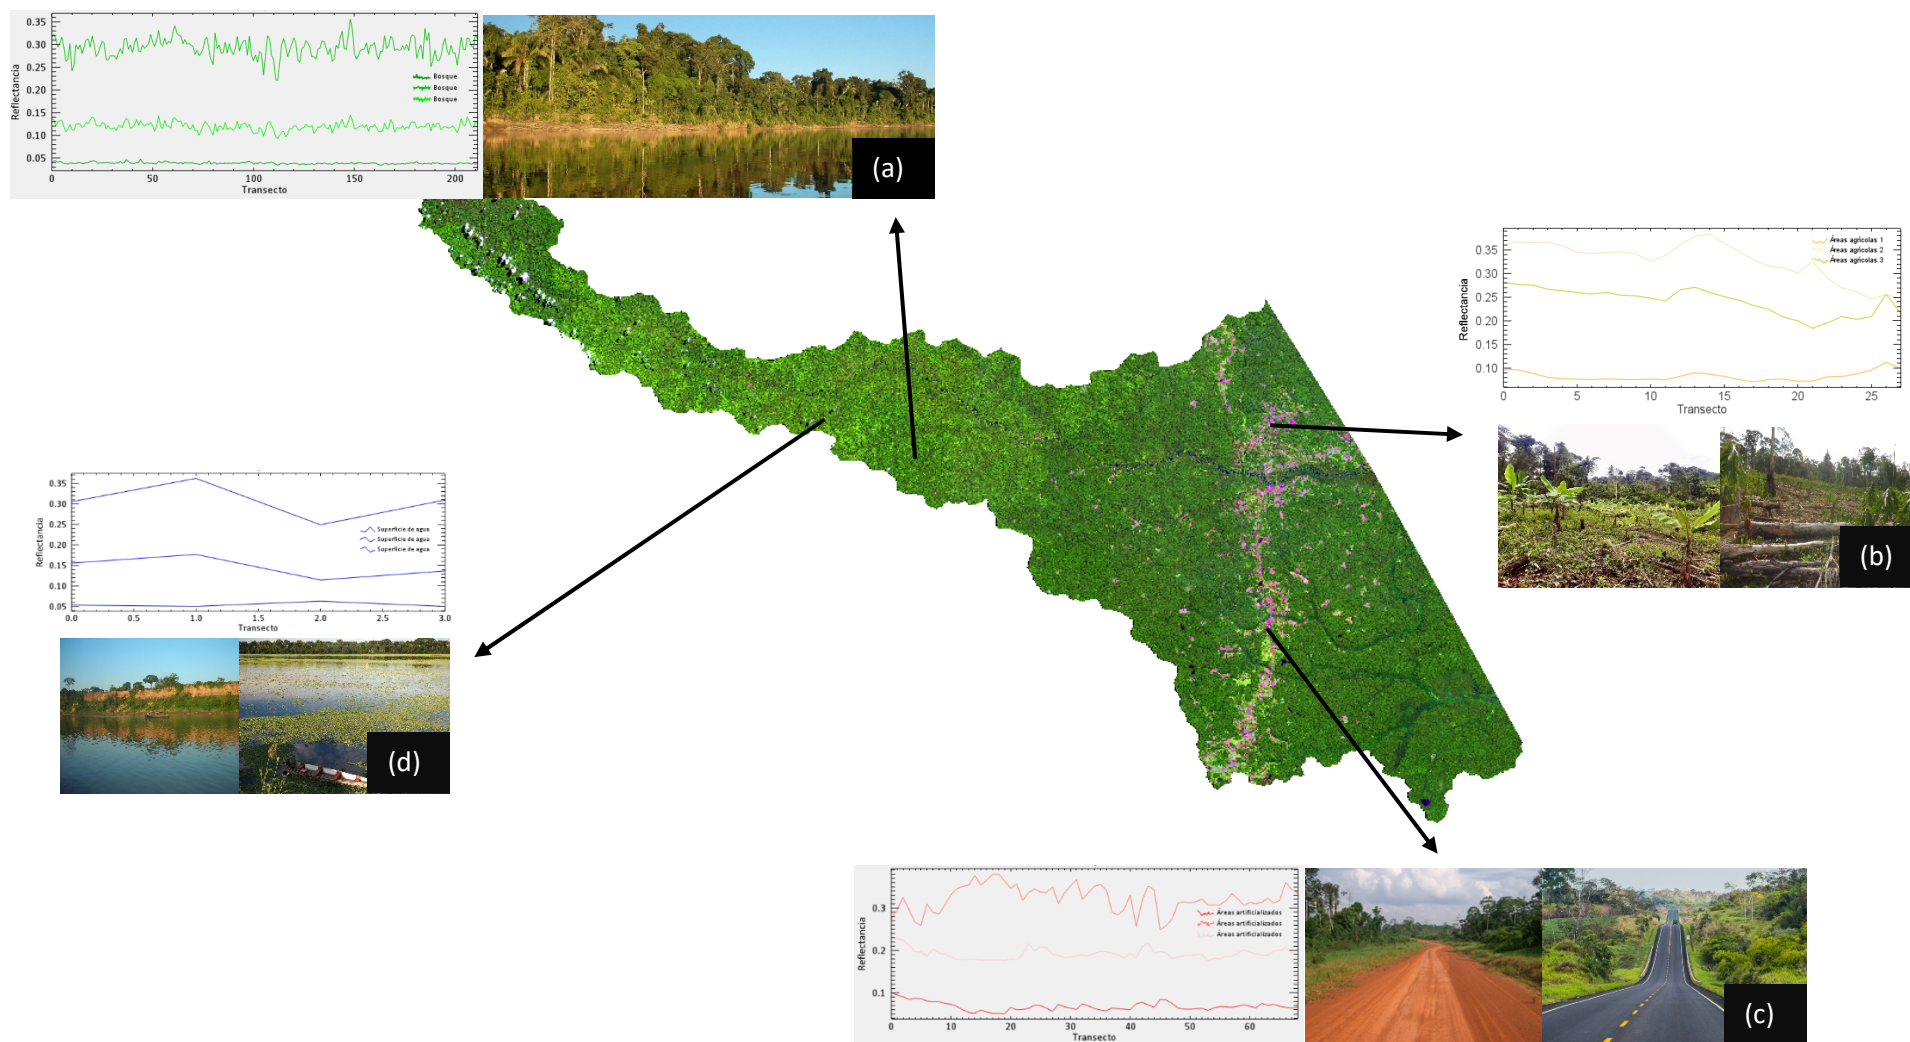

Figure S1. Landsat satellite image, spectral signatures in 2020 R (6) G (5) B (4) bands; (a) Forest and mostly natural areas, (b) Agricultural areas, (c) Artificialized areas, and (d) Water surface.

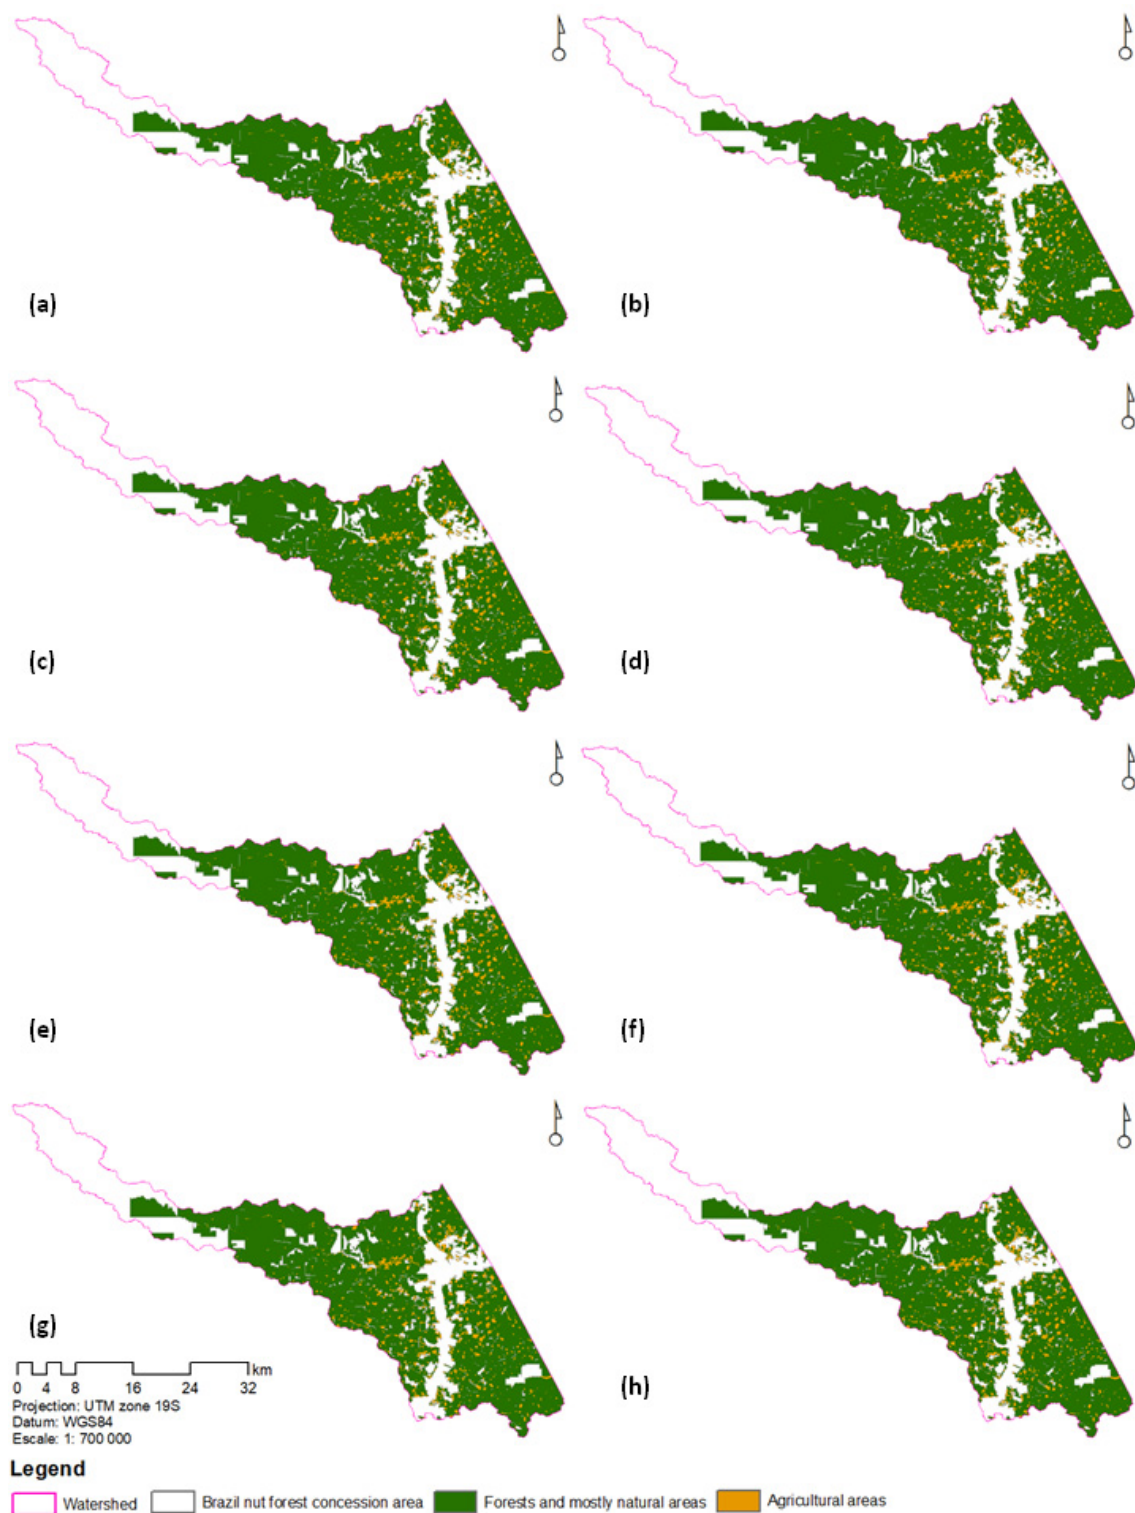

Figure S2. Land use in Brazil nut forest concessions in the Manuripe River micro-basin - Madre de Dios, for the years 2004 (a), 2005 (b), 2006 (c), 2007 (d), 2008 (e), 2009 (f), 2010 (g) and 2011 (h).

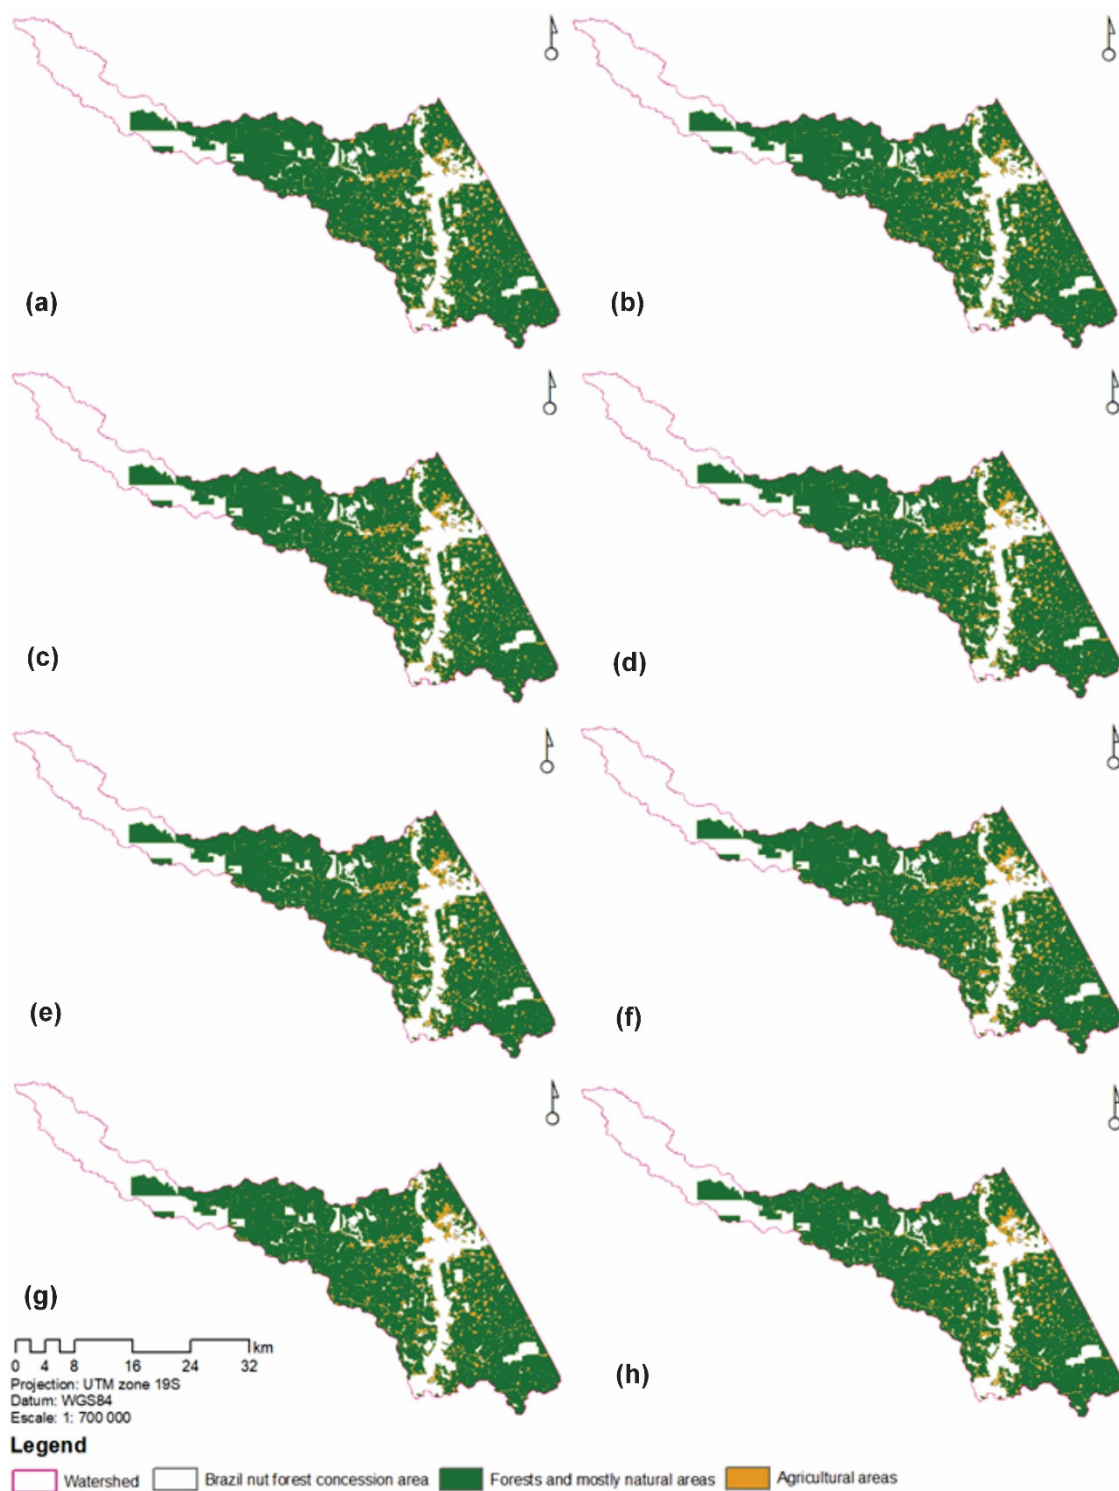

Figure S3. Land use in Brazil nut forest concessions in the Manuripe River micro-basin - Madre de Dios, from the years 2012 (a), 2013 (b), 2014 (c), 2015 (d), 2016 (e), 2017 (f), 2018 (g), and 2019 (h).



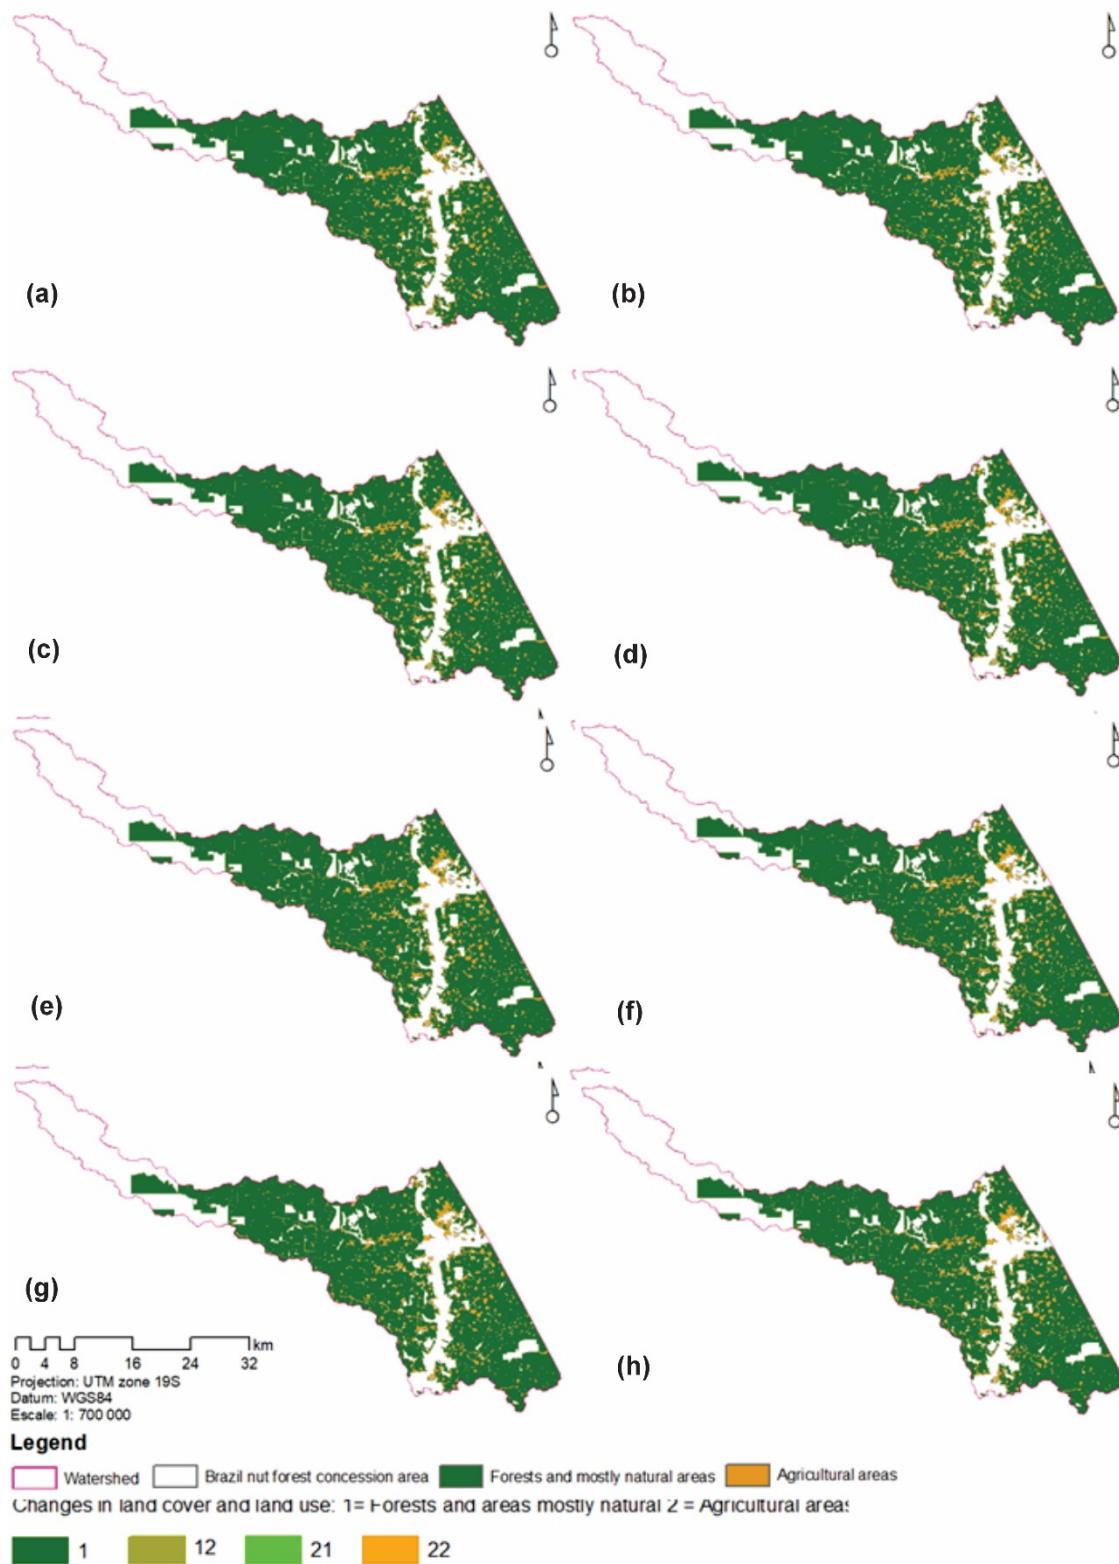

Figure S4. Change in land cover and land use in Brazil nut forest concessions in the Manuripe - Madre de Dios River micro-watershed, for the years 2004-2005 (a), 2005-2006 (b), 2006-2007 (c), 2007-2008 (d), 2008-2009 (e), 2009-2010 (f), 2010-2011 (g), and 2011-2012 (h).

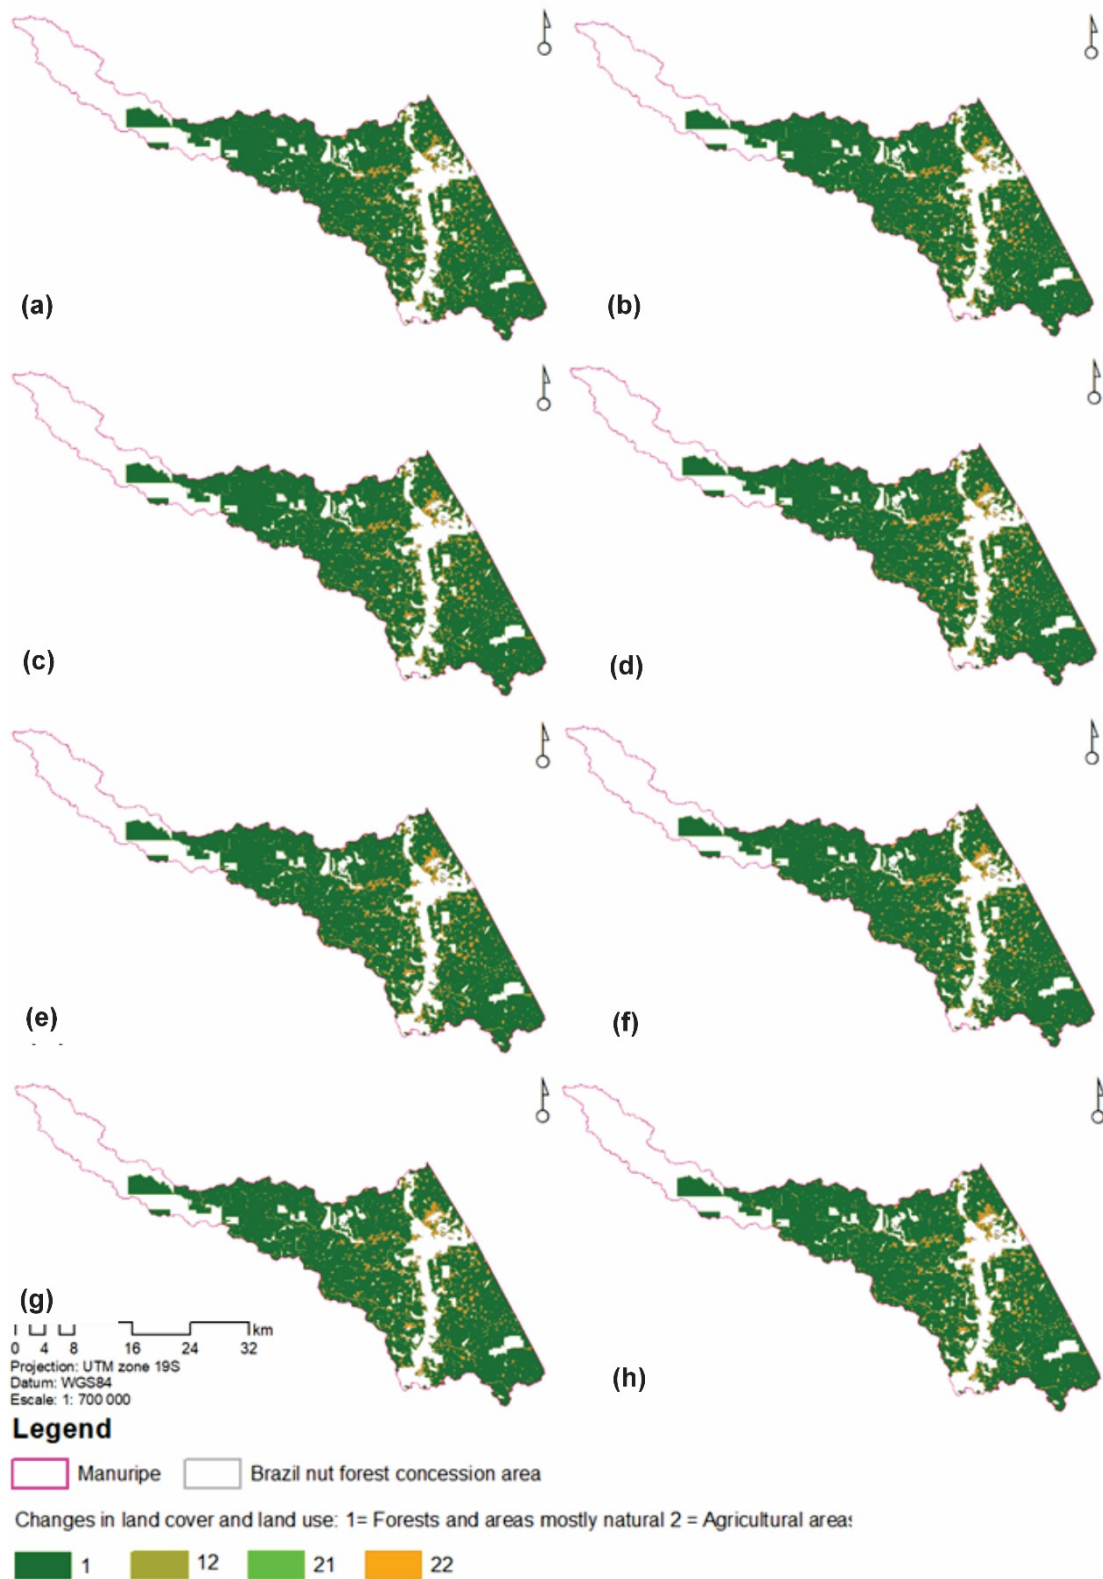

Figure S5. Change in land cover and land use in Brazil nut forest concessions in the Manuripe River micro-watershed - Madre de Dios, for the years 2012-2013 (a), 2013-2014 (b), 2014-2015 (c), 2015-2016 (d), 2016-2017 (e), 2017-2018 (f), 2018-2019 (g), and 2019-2020 (h).
